# Supplementary material for: Proteomic analysis of cerebrospinal fluid from children with central nervous system tumors identifies candidate proteins relating to tumor metastatic spread
Source: PubMed Central journal article supplement (PMC5542258; doi:10.18632/oncotarget.17579), 2017-05-03
Supplement: oncotarget-08-46177-s001.pdf [file oncotarget-08-46177-s001.pdf]

## **Proteomic analysis of cerebrospinal fluid from children with central nervous system tumors identifies candidate proteins relating to tumor metastatic spread**

### **SUPPLEMENTARY MATERIALS**

**Supplementary Data 1: List of proteins and peptides identified by mass spectrometry after the SEQUEST searcher for each sample**

See Supplementary Data 1

**Supplementary Data 2: Spectral count of the 558 identified proteins**

See Supplementary Data 2

**Supplementary Data 3: List of the 558 NCBI annotated proteins identified in both case and control groups after label free spectral counting (scaffold analysis) of the LC-MS/MS results**

See Supplementary Data 3

**Supplementary Data 4: Protein identifiers in column A were downloaded from CSF proteome database [www.biosino.org/bodyfluid](http://www.biosino.org/bodyfluid). This database provides International Protein Index (IPI) identifiers corresponding to 1286 unique proteins. As our proteins were identified by NCBI GI accession numbers, we used David gene ID conversion tool (<https://david.ncifcrf.gov>) to convert the NCBI GI accession numbers to IPI identifiers in order to compare our and Biosino lists (column B). We were able to confidently (status: identical) convert 504 of the 558 NCBI GI accession numbers to 1926 IPI identifiers. In column C the total list of IPI identifiers (3212, both databases); in column D 2878 unique identifiers. Thus 334 identifiers overlapped between the two lists, 1592 identifiers were unique (column E) for our study and 948 unique in Biosino database**

See Supplementary Data 4

**Supplementary Data 5: After the conversion from IPI identifiers to UniProt accession numbers we compared through PANTHER system Uniprot annotations included in Biosino database (column A) with those identified by us (Column B): 793 and 487 annotations, respectively (total annotations in column C, unique in column D). 212 uniprot accession number overlapped; 275 out of 487 annotations (56%) did not overlap Biosino database**

See Supplementary Data 5

**Supplementary Table 1: Cellular components according to the PANTHER database**

See Supplementary File 1

**Supplementary Table 2: Protein classes according to the PANTHER database**

See Supplementary File 1

**Supplementary Table 3: Molecular pathways according to the PANTHER database**

See Supplementary File 1

| Molecular pathways                                                                      | Protein N° |                                                                      |   |
|-----------------------------------------------------------------------------------------|------------|----------------------------------------------------------------------|---|
| Alzheimer disease-amyloid secretase pathway (P00003)                                    | 2          | Interleukin signaling pathway (P00036)                               | 1 |
| Alzheimer disease-presenilin pathway (P00004)                                           | 4          | Ionotropic glutamate receptor pathway (P00037)                       | 1 |
| Alzheimer disease-presenilin pathway (P00004)                                           | 1          | Metabotropic glutamate receptor group I pathway (P00041)             | 1 |
| Angiogenesis (P00005)                                                                   | 2          | Metabotropic glutamate receptor group II pathway (P00040)            | 1 |
| Angiotensin II-stimulated signaling through G proteins and beta-arrestin (P05911)       | 2          | Metabotropic glutamate receptor group II pathway (P00040)            | 1 |
| Angiotensin II-stimulated signaling through G proteins and beta-arrestin (P05911)       | 1          | Metabotropic glutamate receptor group III pathway (P00039)           | 1 |
| Apoptosis signaling pathway (P00006)                                                    | 1          | Methylmalonyl pathway (P02755)                                       | 1 |
| Axon guidance mediated by netrin (P00009)                                               | 2          | Muscarinic acetylcholine receptor 1 and 3 signaling pathway (P00042) | 1 |
| Axon guidance mediated by semaphorins (P00007)                                          | 1          | Nicotine pharmacodynamics pathway (P06587)                           | 1 |
| Axon guidance mediated by Slit/Robo (P00008)                                            | 2          | Nicotinic acetylcholine receptor signaling pathway (P00044)          | 3 |
| B cell activation (P00010)                                                              | 2          | Nicotinic acetylcholine receptor signaling pathway (P00044)          | 1 |
| Blood coagulation (P00011)                                                              | 19         | Opioid prodynorphin pathway (P05916)                                 | 1 |
| Blood coagulation (P00011)                                                              | 14         | Opioid prodynorphin pathway (P05916)                                 | 1 |
| BMP signaling pathway-drosophila (P06211)                                               | 1          | Opioid proenkephalin pathway (P05915)                                | 1 |
| Cadherin signaling pathway (P00012)                                                     | 6          | Opioid proenkephalin pathway (P05915)                                | 1 |
| Cadherin signaling pathway (P00012)                                                     | 3          | p38 MAPK pathway (P05918)                                            | 1 |
| CCKR signaling map (P06959)                                                             | 4          | p53 pathway (P00059)                                                 | 2 |
| CCKR signaling map (P06959)                                                             | 2          | Parkinson disease (P00049)                                           | 3 |
| Cytoskeletal regulation by Rho GTPase (P00016)                                          | 9          | PDGF signaling pathway (P00047)                                      | 2 |
| Cytoskeletal regulation by Rho GTPase (P00016)                                          | 1          | Plasminogen activating cascade (P00050)                              | 7 |
| De novo purine biosynthesis (P02738)                                                    | 1          | Plasminogen activating cascade (P00050)                              | 4 |
| Dopamine receptor mediated signaling pathway (P05912)                                   | 1          | Pyruvate metabolism (P02772)                                         | 1 |
| DPP signaling pathway (P06213)                                                          | 1          | Ras Pathway (P04393)                                                 | 2 |
| DPP-SCW signaling pathway (P06212)                                                      | 1          | SCW signaling pathway (P06216)                                       | 1 |
| EGF receptor signaling pathway (P00018)                                                 | 4          | T cell activation (P00053)                                           | 2 |
| Endothelin signaling pathway (P00019)                                                   | 1          | TGF-beta signaling pathway (P00052)                                  | 2 |
| Enkephalin release (P05913)                                                             | 1          | Toll receptor signaling pathway (P00054)                             | 2 |
| Enkephalin release (P05913)                                                             | 1          | Toll receptor signaling pathway (P00054)                             | 1 |
| FAS signaling pathway (P00020)                                                          | 1          | Transcription regulation by bZIP transcription factor (P00055)       | 1 |
| FAS signaling pathway (P00020)                                                          | 1          | Vasopressin synthesis (P04395)                                       | 2 |
| FGF signaling pathway (P00021)                                                          | 3          | Vasopressin synthesis (P04395)                                       | 1 |
| General transcription by RNA polymerase I (P00022)                                      | 1          | VEGF signaling pathway (P00056)                                      | 2 |
| General transcription regulation (P00023)                                               | 1          | Vitamin D metabolism and pathway (P04396)                            | 1 |
| Glycolysis (P00024)                                                                     | 3          | Vitamin D metabolism and pathway (P04396)                            | 1 |
| Glycolysis (P00024)                                                                     | 1          | Wnt signaling pathway (P00057)                                       | 8 |
| Gonadotropin releasing hormone receptor pathway (P06664)                                | 8          | Wnt signaling pathway (P00057)                                       | 3 |
| Gonadotropin releasing hormone receptor pathway (P06664)                                | 2          |                                                                      |   |
| Huntington disease (P00029)                                                             | 8          |                                                                      |   |
| Huntington disease (P00029)                                                             | 3          |                                                                      |   |
| Huntington disease (P00029)                                                             | 3          |                                                                      |   |
| Inflammation mediated by chemokine and cytokine signaling pathway (P00031)              | 13         |                                                                      |   |
| Inflammation mediated by chemokine and cytokine signaling pathway (P00031)              | 3          |                                                                      |   |
| Insulin/IGF pathway-mitogen activated protein kinase kinase/MAP kinase cascade (P00032) | 1          |                                                                      |   |
| Integrin signalling pathway (P00034)                                                    | 15         |                                                                      |   |
| Integrin signalling pathway (P00034)                                                    | 3          |                                                                      |   |
| Interferon-gamma signaling pathway (P00035)                                             | 1          |                                                                      |   |

Supplementary Figure 1: Overview of the distribution of molecular functions in control (red) and cases (black) and shared (highlighted in orange) according to the PANTHER database.

**Analysis of the efficiency of the nanoparticles-ESI-MS/MS workflow**

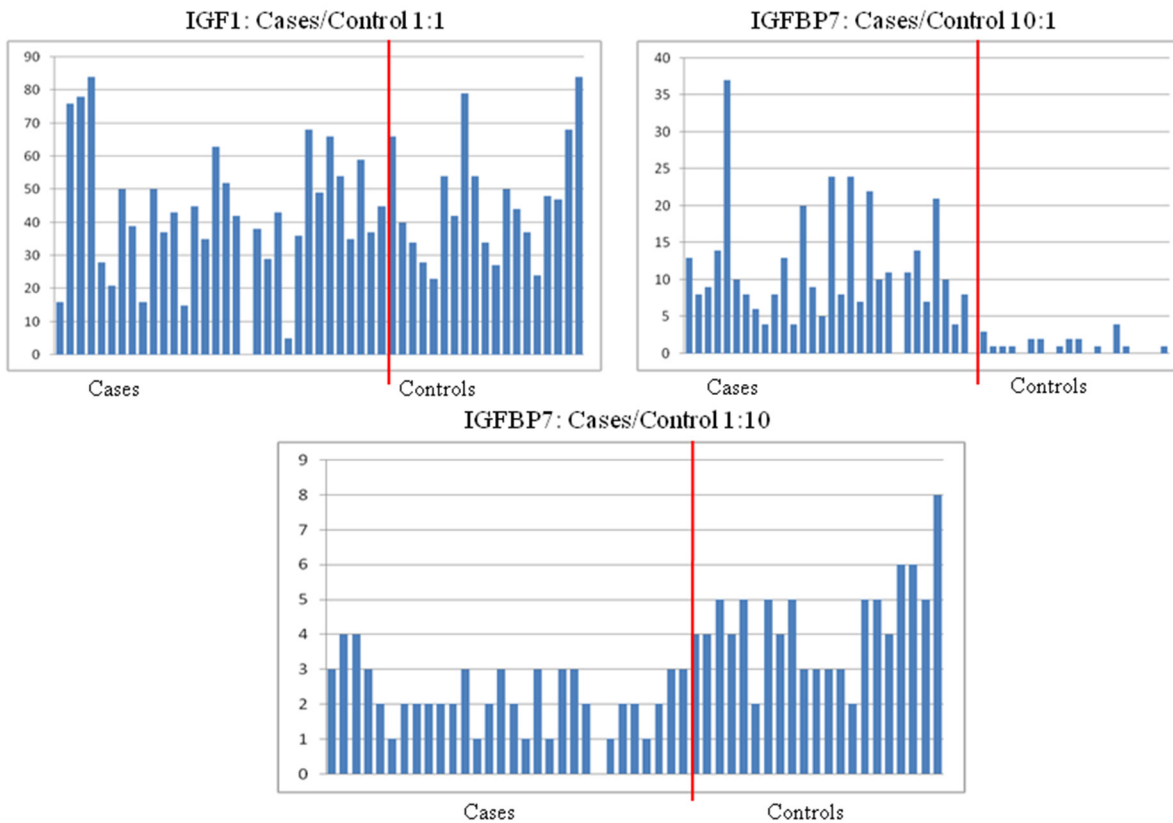

**Supplementary Figure 2: Two chemokines IGFBP7 and IGF-1 were spiked in the CSF samples before nanoparticles incubation as control standards in order to evaluate the performance of nanoparticles harvesting.** These chemokines were spiked in cases versus controls in a ratio of 10:1, 1:1, respectively. After Scaffold analysis, they were found to be differentially abundant with a ratio similar to the expected one, (actual ratio of 11.1 and 0.92) in brain tumor samples versus controls.
